# Supplementary material for: Novel Comprehensive Bioinformatics Approaches to Determine the Molecular Genetic Susceptibility Profile of Moderate and Severe Asthma
Source: MDPI journal article supplement (doi:10.3390/ijms21114022), 2020-06-04
Supplement: s1 [file s1]

# **Novel comprehensive bioinformatics approaches to determine the molecular genetic susceptibility profile of moderate and severe asthma**

**Hatem Zayed \***

Department of Biomedical Sciences College of Health Sciences, QU Health, Qatar University, Doha, Qatar

\*Correspondence to: Hatem Zayed, PhD, email: [hatem.zayed@qu.edu.qa](mailto:hatem.zayed@qu.edu.qa); Tel.: 00974-4403-4809

**File S1. The programming scripts and software parameters.** Data analysis, tables, and diagrams were created using several programming tools. These tools include many programming languages and a variety of softwares. Some of these programming languages have been used to extract and handle genomic data. Programming languages Python3, R, PERL, C, and Shell programming language.

- **Software and online tools were used for construction of the diagrams:**

- iTOL : <http://itol.embl.de/>
- Circos : <http://circos.ca/>
- Venn : <http://bioinformatics.psb.ugent.be/webtools/Venn/>
- NCBI Geo2R : <https://www.ncbi.nlm.nih.gov/geo/geo2r/>
- Cytoscape : <https://cytoscape.org/>
- Cytoscape PINA4MS: <http://apps.cytoscape.org/apps/pina4ms>
- Ensembl biomart: <https://m.ensembl.org/info/data/biomart/index.html>
- Ensembl Human : [https://www.ensembl.org/Homo\\_sapiens/Info/Index](https://www.ensembl.org/Homo_sapiens/Info/Index)
- BLAST\_package:  
<ftp://ftp.ncbi.nlm.nih.gov/blast/executables/blast+/LATEST/>.
- DAVID : <https://david.ncifcrf.gov/>
- GeneGO™ MetaCore™ software : <https://portal.genego.com/>
- 1000 genome project SNPs (<https://www.internationalgenome.org/data>).
- Human\_genome\_annotation:[ftp://ftp.ensembl.org/pub/release-100/gff3/homo\\_sapiens](ftp://ftp.ensembl.org/pub/release-100/gff3/homo_sapiens)

- **Bioinformatics tools used data retrieval and Figures construction:**

- Circos, Ensembl biomaRt, Ensembl Human BLAST\_package : Figure 1
- The iTOL : Figure 3
- The Venn tool : Figure 2
- The Cytoscape software : Figure 4
- Cytoscape PINA4MS : Figure 5
- DAVID and GeneGO™ MetaCore™ software: Figures 6, 7 and 8.

- **Protocol used for data analysis:**

- The NCBI tool for analysis of the Gene Expression Omnibus (GEO), GEO2R, was used to analyze data from the GSE43696 dataset.
- The 250 differentially expressed genes (DEGs) were downloaded from the GEO.
- The DEGs affymetrix microarray codes and gene names extracted from the table from step 2 were used for the gene enrichment analysis, using DAVID and GeneGO™. MetaCore™ software was used to refine the enrichment of these genes in the context of related pathways (Figures 6, 7, and 8).
- Details on DEGs obtained from **step 1** included the chromosomal location in karyotype format was used for Venn analysis for Figure 2.
- In order to perform gene clustering, the amino acid (aa) sequences should be available. The problem would be gene synonymous (where one gene could have different code names). In order to extract the aa sequence of DEGs, a C script (**Script 1**) and PERL script (**Script 2**) were used. These scripts use a list of gene names, the human whole genome annotation (GFF format) retrieved from Ensemble Human database and the Human proteome (FASTA format). The output will include the amino acid sequences of DEGs.
- The amino acid sequences retrieved from **Step 5** were used for gene clustering using **Script 3**. The output file was filtered manually for sequence alignment length of 300 aa and sequence similarity of 70%.
- Using gene names retrieved from **Step 5** (all gene names), **Scripts 4 and 5** were used to retrieve single nucleotide variations (SNPs) linked to this gene and known diseases from 1000 genome project database.
- The DEGs genomic locations were retrieved from Human genome information using **Script 6**.
- **Step 1 to 8** outputs were used as an input for Circos tool (**Figure 1**) using **Script7**.
- Tables of information retrieved from all analysis **steps of 1-8** were used as a supplementary data. **Script 8** was used to combine these analyses.

- **List of the used scripts in the manuscript:**

**Script 1:** This script was included in clustering of asthma-associated DEGs using sequence similarity. **Programming language: C.** **Input:** list of genes names and human genome annotation of GRCh38 version (GFF format). **Output:** list of gene names and codes (different names for the same gene) and official gene accession number.

```
#include <stdio.h>

#include <stdlib.h>

#include <string.h>

typedef enum { false, true } bool;

int main(int argc, char *argv[])

{

    FILE *fp;

    size_t len=0;

    ssize_t read;

    char *line=NULL;

    fp=fopen(argv[2],"r");

    if(fp == NULL)

        exit(EXIT_FAILURE);

    while((read=getline(&line,&len,fp))!=1) {

        if(strstr(line, "    gene    ") != NULL) {

            line[strlen(line)]='\0';

            char gene_form_1[50]="gene=";

            char gene_form_2[50]=", ";

            char gene_form_3[50]="=";

            char gene_form_4[50]=", ";

            char gene_form_5[50]="gene=";

            //1

            strcat(gene_form_1,argv[1]);

            strcat(gene_form_1,";");

            gene_form_1[strlen(gene_form_1)]='\0';

            //2

            strcat(gene_form_2,argv[1]);

            strcat(gene_form_2,";");

            gene_form_2[strlen(gene_form_2)]='\0';

            //3

            strcat(gene_form_3,argv[1]);

            strcat(gene_form_3,";");

            gene_form_3[strlen(gene_form_3)]='\0';

            //4 this needs to the same length

            strcat(gene_form_4,argv[1]);

            gene_form_4[strlen(gene_form_4)]='\0';
```

```

//5 this needs to the same length

strcat(gene_form_5,argv[1]);

gene_form_5[strlen(gene_form_5)]='\0';


//matching

char * pch_1;

char * pch_2;

char * pch_3;

char * pch_4;

char * pch_5;

pch_1 = strstr(line,gene_form_1);

pch_2 = strstr(line,gene_form_2);

pch_3 = strstr(line,gene_form_3);

pch_4 = strstr(line,gene_form_4);

pch_5 = strstr(line,gene_form_5);

bool f_4 = ((pch_4!=NULL)&&((strlen(pch_4)-2)==strlen(argv[1])));

bool f_5= ((pch_5!=NULL)&&(strstr(pch_5+strlen(pch_5)," ")==NULL));

//

if(pch_1 != NULL || pch_2 != NULL || pch_3 != NULL || f_4 || f_5) {

printf("%s\t%s", argv[1],line);

fclose(fp);

if (line)

free(line);

exit(EXIT_SUCCESS);

return 0;

}

}

}

```

**Script 2:** This script was included in clustering of asthma-associated DEGs using sequence similarity. **Programming language : Python3.** **Input:** list gene accession number and human proteome (all human genome amino acid sequences). **Output:** Gene amino acid sequences in FASTA format. If the amino acid accession is not available it will be labelled “Not here”.

```
#!/usr/bin/python3
```

```
def read_fasta(file):
```

```
seq = {}
```

```

header = ""

sequence = ""

with open(file) as fp:

    for line in fp:

        line = line.strip()

        if len(line) > 0:

            if line[0] == ">":

                if len(sequence) != 0 and len(header) > 0:

                    seq[header] = ""

                    seq[header] = sequence

                    sequence=""

                    header = line.split(" ")[0][1:]

                    sequence += line + "\n"

            seq[header] = sequence

        return seq

seencount={}

seq=read_fasta(sys.argv[1])

nothfp=open("NOTHERE.txt","a+")

with open(sys.argv[2]) as myids:

    for myid in myids:

        try:

            print (seq[myid.strip()])

        except:

            nothfp.write("this is not here %%%"+myid.strip()+"\n")

nothfp.close()

```

**Script 3:** This script was included in clustering of asthma-associated DEGs using sequence similarity. **Programming language : Shell (Linux ) scripting.** **Note:** The NCBI-Blastp local package has been used (<https://ftp.ncbi.nlm.nih.gov/blast/executables/blast+/LATEST/ncbi-blast-2.10.0+-src.tar.gz>). **Input :** Amino acid sequences in FASTA format. **Output:** Table of sequences that have a high similarity and sequence alignment information such as alignment length, similarity score and E-value.

```

#make blast database

makeblastdb -i seqfilename -parse_seqids -dbtype prot

#format the sequence database

```

```
formatdb -i seqfilename -p T -V
```

```
#start basting
```

```
blastall -p blastp -i asthmagenes.fasta -d asthmagenes.fasta -o result.out -m 8 -evalue 0.0001
```

**Script 4:** This script was included in extracting the information of pathogenic and diseases related to DEGs of asthma. **Programming language: PERL.** **Note :** The PERL script uses the 1000 genome project SNPs (<https://www.internationalgenome.org/data>) and the gene annotation file of human genome downloaded from Ensembl ( [ftp://ftp.ensembl.org/pub/release-100/gff3/homo\\_sapiens](ftp://ftp.ensembl.org/pub/release-100/gff3/homo_sapiens) ). **Input:** list of genes names. **Output:** pathogenic SNPs and associated diseases.

```
use strict;

my %items;

my %data_file = read_file($ARGV[0]);

print "genename\t(pathogenic-snps\t(diseasetypes\n";

foreach my $gene(keys(%{$data_file{"genes"}}))

{

    print $gene."\t".$data_file{"genes"}{$gene}{"path"}."\t".$data_file{"genes"}{$gene}{"distypes"}."\n";

}

foreach my $dis(keys(%{$data_file{"disease"}}))

{

    #print $dis."\t".$data_file{"disease"}{$dis}."\n";

}

mkdir "DISEASESNPS";

foreach my $dis(keys(%{$data_file{"diseases"}}))

{

    open(FILE,">DISEASESNPS/$dis.txt");

    foreach my $rs(@{$data_file{"diseases"}{$dis}})

    {

        #print FILE $rs."\n";

    }

    close FILE;

}

#GENEINFO

sub read_file

{

    my ($file)=@_ ;

    my %data;

    my $gene;

    my $cInd;

    open(FILE,$file);
```

```

while(<FILE>)

{

chomp();

my @line=split(/\./,$_);

#print $_;


if(/(GENEINFO/)&&/(CLNDN/)&&/(Pathogenic/))

{

my $rs;

foreach my $i ( @line)

{

if($i=~m/(\S+)=(\S+)/g)

{

my $id=$1;my $val=$2;

if($id eq "GENEINFO")

{

$gene=$val;

$gene=~s/\.\S+//g;

}

if($id eq "RS")

{

$rs=$val;

$rs=~s/(\S+)/rs\1/g;

#   print $rs."\n";

}

if($id eq "CLNDN")

{

$clnd=$val;

}

}

}

}

$data{"genes"}{$gene}{"path"}++;

my @dis=split(/\|/, $clnd);

foreach my $d (@dis)

{

$data{"disease"}{$d}++;

push(@{$data{"diseases"}{$d}}, $rs);

$data{"genes"}{$gene}{"distypes"}++;

}

}

}

close FILE;

```

```

return %data;

}

if($ARGV[0] eq "")

{

return ;

}

```

**Script 5:** This script was included in extracting the information of pathogenic and diseases related to DEGs of asthma. **Programming language: R.** **Note:** was used to confirm results of **script 4**. This script uses the Ensemble BioMart database. **Input:** list of genes names. **Output:** pathogenic SNPs and other information.

```

library(biomaRt)

variation = useEnsembl(biomaRt="snp", dataset="hsapiens_snp")

while(!file.exists(paste(GENE,"-SNPs.csv")))

{

tryCatch(

  expr = {

    RESULT = getBM(attributes=c(

      'refsnp_id',

      'chrom_start',

      'allele',

      'mapweight',

      'minor_allele_freq',

      'minor_allele_count',

      'clinical_significance',

      'phenotype_name',

      'p_value',

      'pmid',

      'polyphen_score',

      'sift_prediction',

      'sift_score',

      'motif_name',

      'motif_start',

      'motif_score_delta'

    ), filters = c('chr_name','start','end'), values =list(chrom,start,end), mart = variation)

    write.table(RESULT,paste(GENE,"-SNPs.csv"),sep=";")

  },

  error = function(e){

    print("RETRY")

  }

}

```



```

)
}

chrom=c(8)

start=c(43140464)

end= c(43202855)

GENE="genename";

#Database

source("GET-SNPs-ENSEMBLE.r")

```

**Script 6:** This script was included in locating DEGs genomic location. **Programming language: Python3 and Shell (linux) programming** **Input:** list of genes names, Human genome annotation file (GFF format). **Output:** chromosomal location of genes

```

#!/usr/bin/python3

import re

import os

chrdict={}

with open("chrom-list.txt","r") as chrofp:

    for chro in chrofp:

        chrdict[chro.split()[0]]=chro.split()[1]

with open("list-genes.txt") as genelist:

    for gene in genelist:

        command="/find-gene-in-gff"+gene.strip()+
INFO/GCF_000001405.26_GRCh38_genomic.gff "

        stream=os.popen(command)

        out=stream.read().strip()

        if len(out) is not 0:

            line=out.split("\t")

            try:

                line[1]=chrdict[line[1]]

                print("\t".join(line))

            except:

                pass

```

## Script 7: Programming language : Circos configuration file

**Note:** The circos program (<http://circos.ca/software/download/>) used information of genes location, SNPs and related diseases count, and the asthma-associated genes p-value (-log10pvalue). These files have been retrieved using the steps mentioned above. Additionally, the human karyotype information was retrieved and chromosome regions with no associated genes were broken. **Input:** several information retrieved from analysis. **Output:** Human genome in circular shape, where all results are depicted in figure 1.

```
karyotype =DEF.txt

####If your chromosomes samller than this please adjust

chromosomes_units = 1000000

chromosomes_breaks=Chr1:209756032-209782320;.....

chromosomes_display_default = yes

chromosomes_scale = PSET=0.1r

<<include ideogram.conf>>

chromosomes_color = PSET=White

<plots>

  <plot>

    type = text

    color =black

    file = GENESTITLE.txt

    r0 = 1r

    r1 = 1r+350p

    label_size = 12

    label_font = bold

    show_links = yes

    link_dims = 0p,2p,6p,2p,5p

    link_thickness = 2p

    link_color = black

    label_snuggle = yes

    max_snuggle_distance = 1r

    snuggle_tolerance = 0.25r

    snuggle_sampling = 2
```

```
snuggle_refine    = yes

</plot>

<links>

<link>

file      = gene-go-link.txt

radius    = 0.95r

ribbon     = yes

bezier_radius = 0r

flat       = yes

color      = blue

thickness  = 2

z=100

radius1    = 1r

<rules>

<rule>

condition = var(id) =~ /(d+)-(d+)/

</rule>

</rules>

</link>

</links>

<plot>

type = line

stroke_type = outline

file = p-value/M-vs-S.txt

orientation = out

r1  = 0.6r

r0  = 0.5r

min  = 2

max  = 10

fill_color    = vdgreen

extend_bin = no

</plot>

<plot>
```

```
type = line

stroke_type = outline

file = p-value/S-vs-C.txt

orientation = out

r1 = 0.7r

r0 = 0.6r

min = 2

max = 10

fill_color = acen

extend_bin = no

</plot>

<plot>

type = line

stroke_type = outline

file = p-value/M-vs-C.txt

orientation = out

r1 = 0.8r

r0 = 0.7r

min = 2

max = 10

fill_color = purple

extend_bin = no

</plot>

<plot>

type = line

stroke_type = outline

file = SNSp-PATH/DISEASE-COUNT.txt

orientation = out

r1 = 0.9r

r0 = 0.8r

fill_color = blue

extend_bin = no

</plot>
```

```
<plot>

type = line

stroke_type = outline

file = SNSp-PATH/SNP-PATH-COUNT.txt

orientation = out

r1 = 0.99r

r0 = 0.9r

fill_color = red

extend_bin = no

</plot>
```

```
<plot>

type = text

color = red

file = Chrom-info/bands-labels.txt

r0 = 1r

r1 = 1r+300p

label_size = 8

label_font = condensed

orientation = out

show_links = yes

link_dims = 0p,2p,6p,2p,5p

link_thickness = 2p

link_color = black

label_snuggle = yes

max_snuggle_distance = 1r

snuggle_tolerance = 0.25r

snuggle_sampling = 2

snuggle_refine = yes

</plot>
```

```
</plots>
```

```
<links>
```

```
<link>
```

```
file = links/LINKS.tx
```

```

radius      = 0.5r
ribbon      = yes
bezier_radius = 0r
flat        = yes
color       = blue
thickness   = 10
radius1     = 0.5r

<rules>
<rule>

condition   = 1
color       = eval(var(chr2))
flow        = continue

</rule>
</rules>

</link>

</links>

<image>

<<include etc/image.conf>>

</image>

<<include etc/colors_fonts_patterns.conf>>

<<include etc/housekeeping.conf>>

```

**Script 8:** This script was used to combine different results using common row name and information. **Programming language: Python3.** **Note:** Combining tables with “NA” if there is no shared row. This Python script was used to create the list of DEGs across different gene expression profiles. **Input:** list of Tables of outputs. **Output:** chromosomal location of genes

```

#!/usr/bin/python3

import sys

import re

myfiles=sys.argv[1:]

rows={}

data={}

filerowlen={}

for f in myfiles:

```

```

with open(f,"r") as datafile:

    for line in datafile:

        r=line.strip().split("\t")[0]

        if f in filerowlen:

            if len(line.strip().split("\t")) > filerowlen[f]:

                filerowlen[f]=len(line.strip().split("\t"))

            else:

                filerowlen[f]=len(line.strip().split("\t"))

        rows[r]=1

        if f not in data:

            data[f]={}

        data[f][r]=line.strip()

for myfile in myfiles:

    spacen=filerowlen[myfile]

    mfilename=re.sub(r'\S+\s+([^\s ]+$)',r'\1',myfile)

    print((str(mfilename)+"\t")*spacen,end="")

print()

for row in rows:

    for myfile in myfiles:

        if row in data[myfile]:

            rowlen=len(data[myfile][row].split("\t"))

            print(data[myfile][row]+\t*(filerowlen[myfile]-rowlen),end="\t")

        else:

            print("NA\t"*(filerowlen[myfile]),end="")

print()

```
